# Supplementary material
Source: Springer Nature journal article supplement (https://www.springermedizin.de/resource/supplementary/12936_2013_3001_MOESM1_ESM.pdf/9544822)
Supplement: MOESM1 [file 9544822]

|                   |                                                                        |    |    |
|-------------------|------------------------------------------------------------------------|----|----|
|                   | 21                                                                     | 55 | 90 |
|                   | *                                                                      | *  | *  |
| MAL-1             | GTATTGGAGATTTTGTACTTTGAGTAAATTAGAGTGTTCAAAGCAAACAGTTAAAGCATTCTTACTGCGT |    |    |
| MAL-2             | .....C.....                                                            |    |    |
| PoC4 (curtisi)    | .....                                                                  |    |    |
| PoC14 (curtisi)   | .....                                                                  |    |    |
| Nigeria (curtisi) | .....T.....                                                            |    |    |
| PoW1 (wallikeri)  | ...C.....                                                              |    |    |
| Thai (wallikeri)  | ...C.....                                                              |    |    |
| Pow13 (wallikeri) | ...C.....                                                              |    |    |

|                   |                                                                       |     |     |
|-------------------|-----------------------------------------------------------------------|-----|-----|
|                   | 91                                                                    | 125 | 159 |
|                   | *                                                                     | *   | *   |
| MAL-1             | TTGAATACTACAGCATGGAATAACAAAATTGAACAAGTCAGAATTCTGTTCTTTTTTCTTATTTTGGCT |     |     |
| MAL-2             | .....                                                                 |     |     |
| PoC4 (curtisi)    | .....C.....C.....                                                     |     |     |
| PoC14 (curtisi)   | .....C.....C.....                                                     |     |     |
| Nigeria (curtisi) | .....                                                                 |     |     |
| PoW1 (wallikeri)  | .....A.....C.....                                                     |     |     |
| Thai (wallikeri)  | .....A.....C.....                                                     |     |     |
| Pow13 (wallikeri) | .....A.....C.....                                                     |     |     |
